# Supplementary figures and images for: Alkaloid Constituents of the Amaryllidaceae Plant Amaryllis belladonna L
Source: MDPI journal article supplement (doi:10.3390/molecules22091437), 2017-08-31

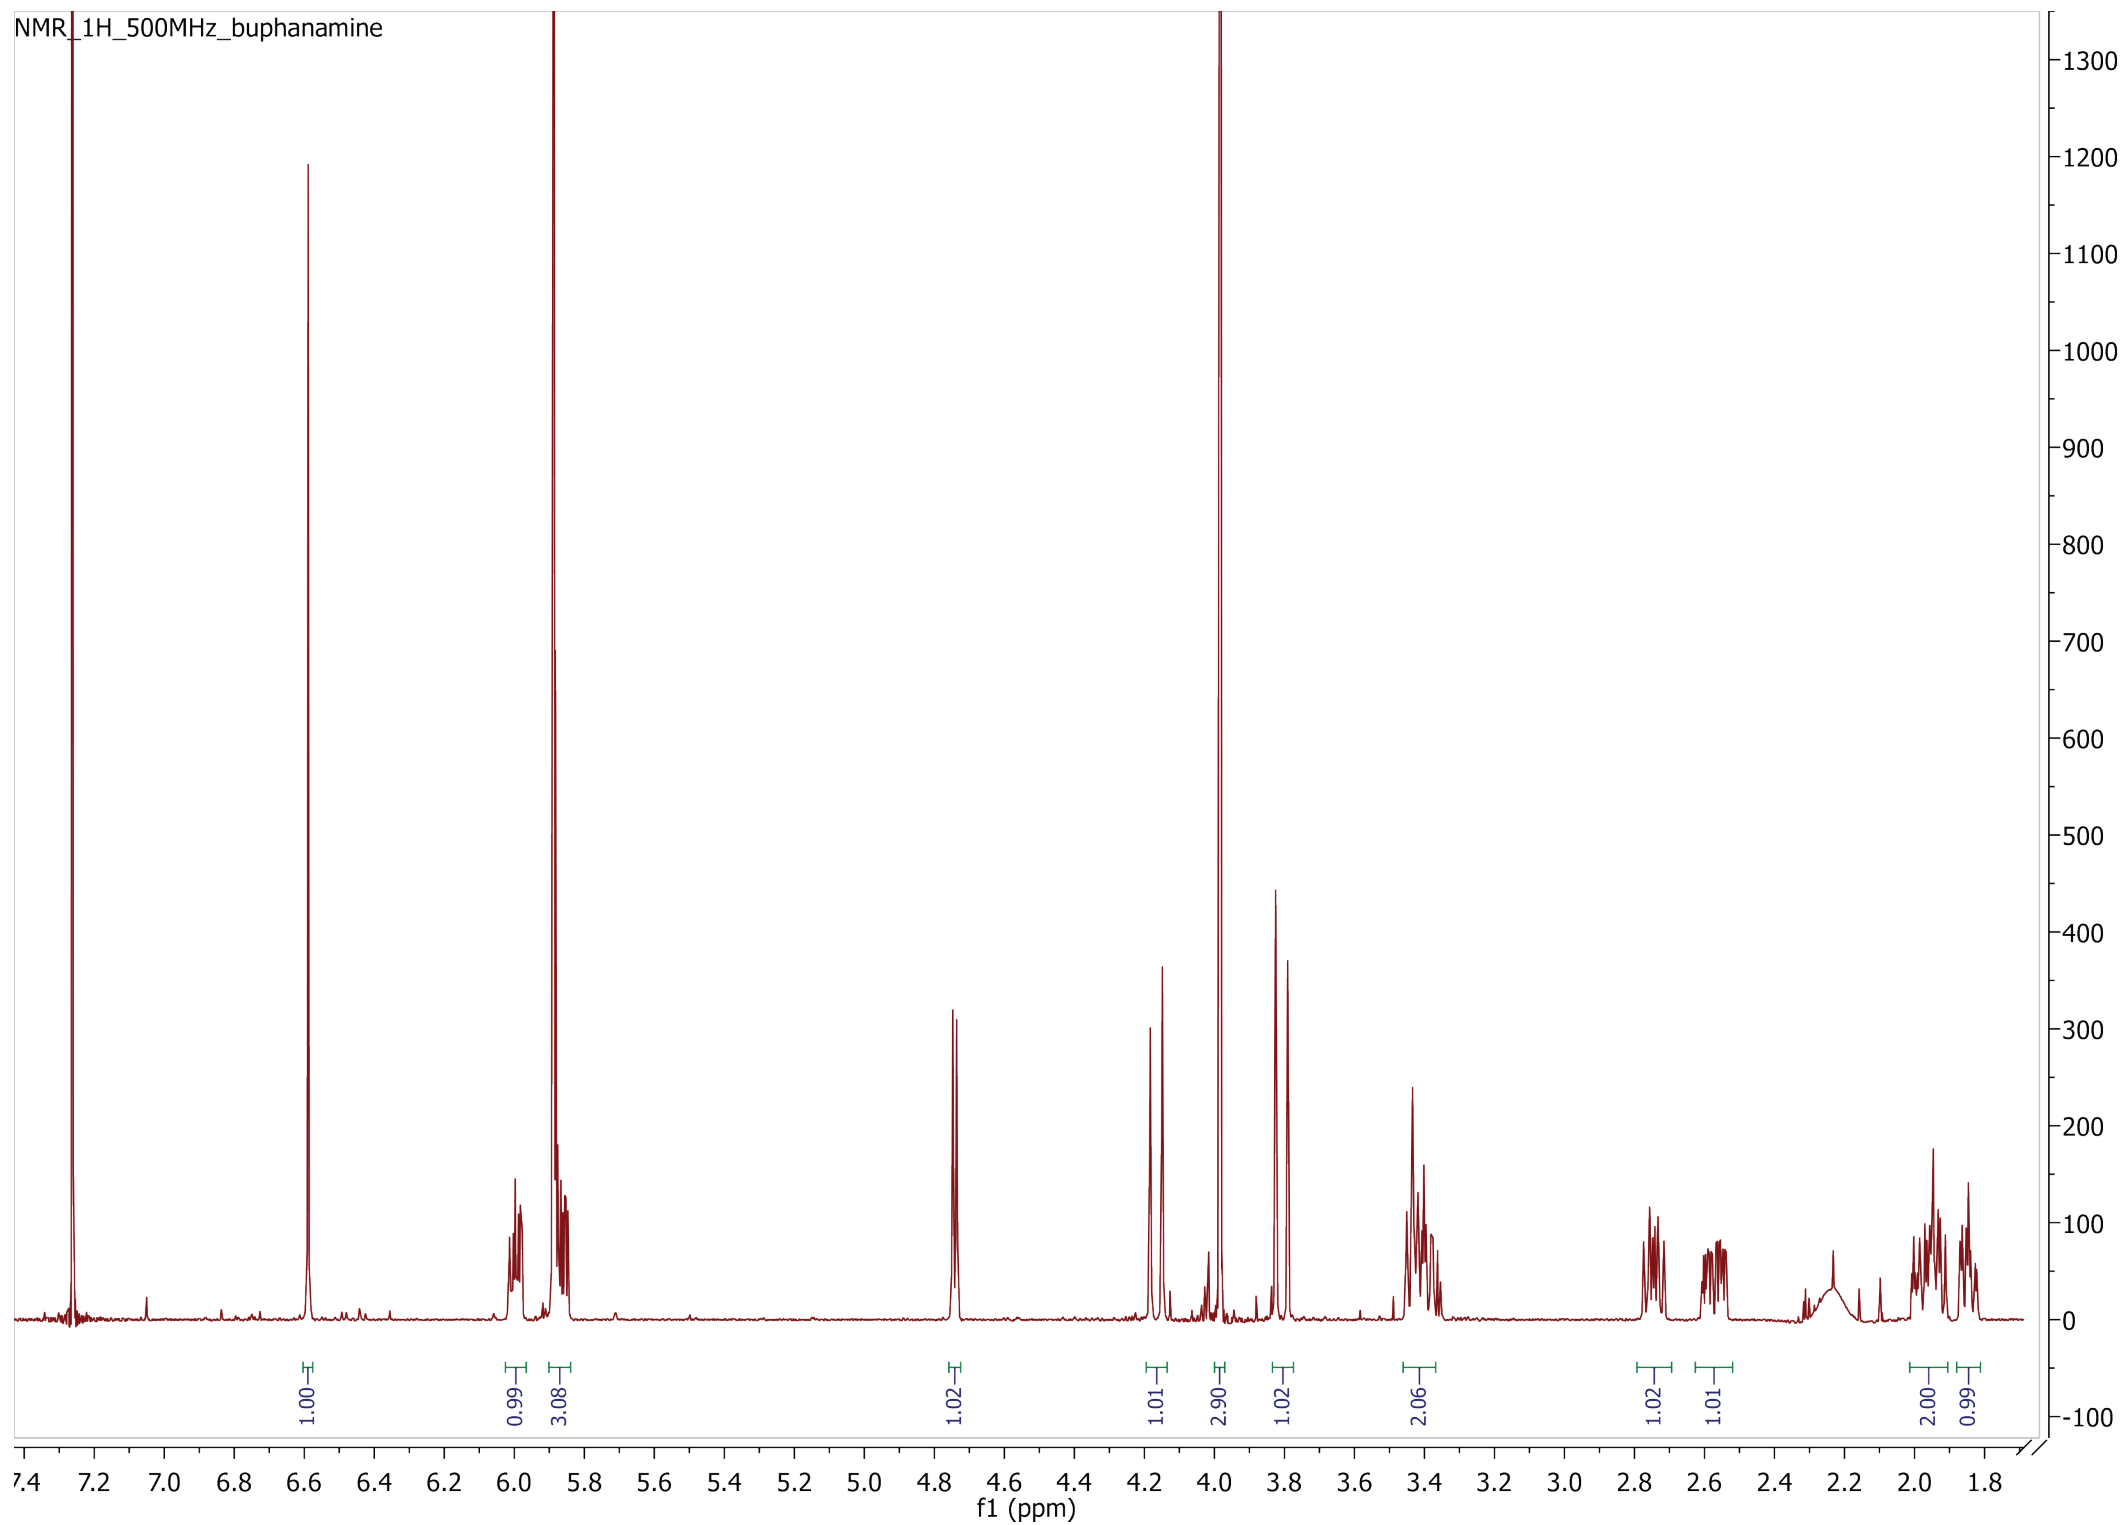

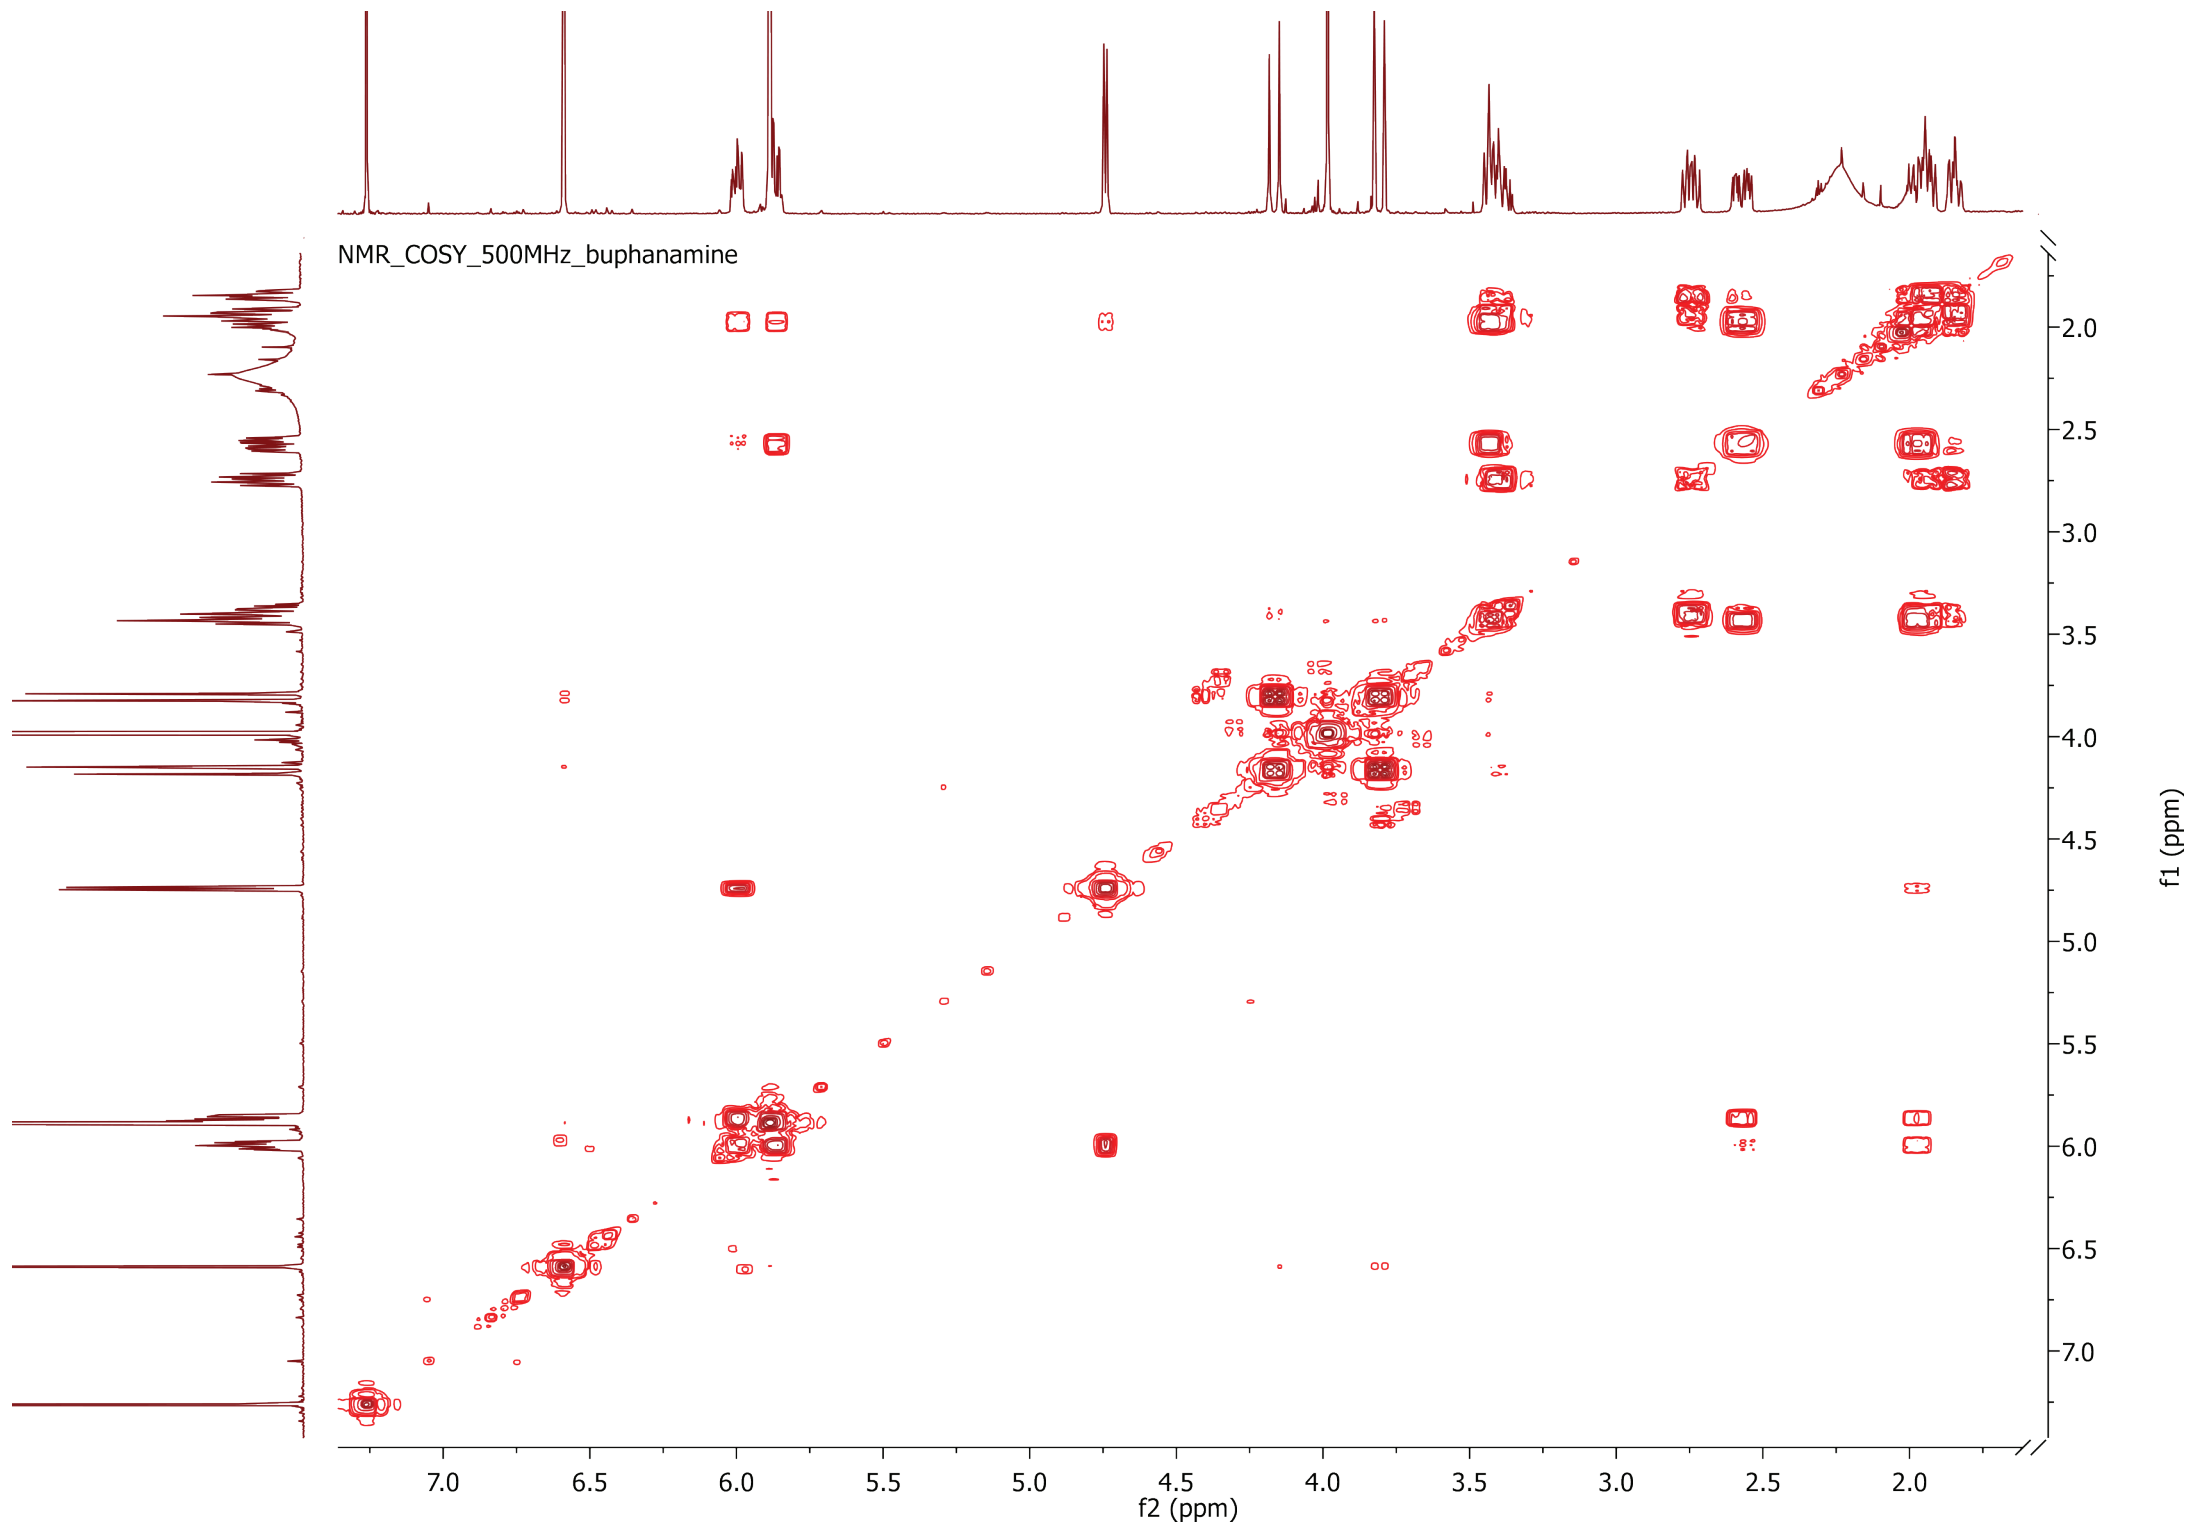

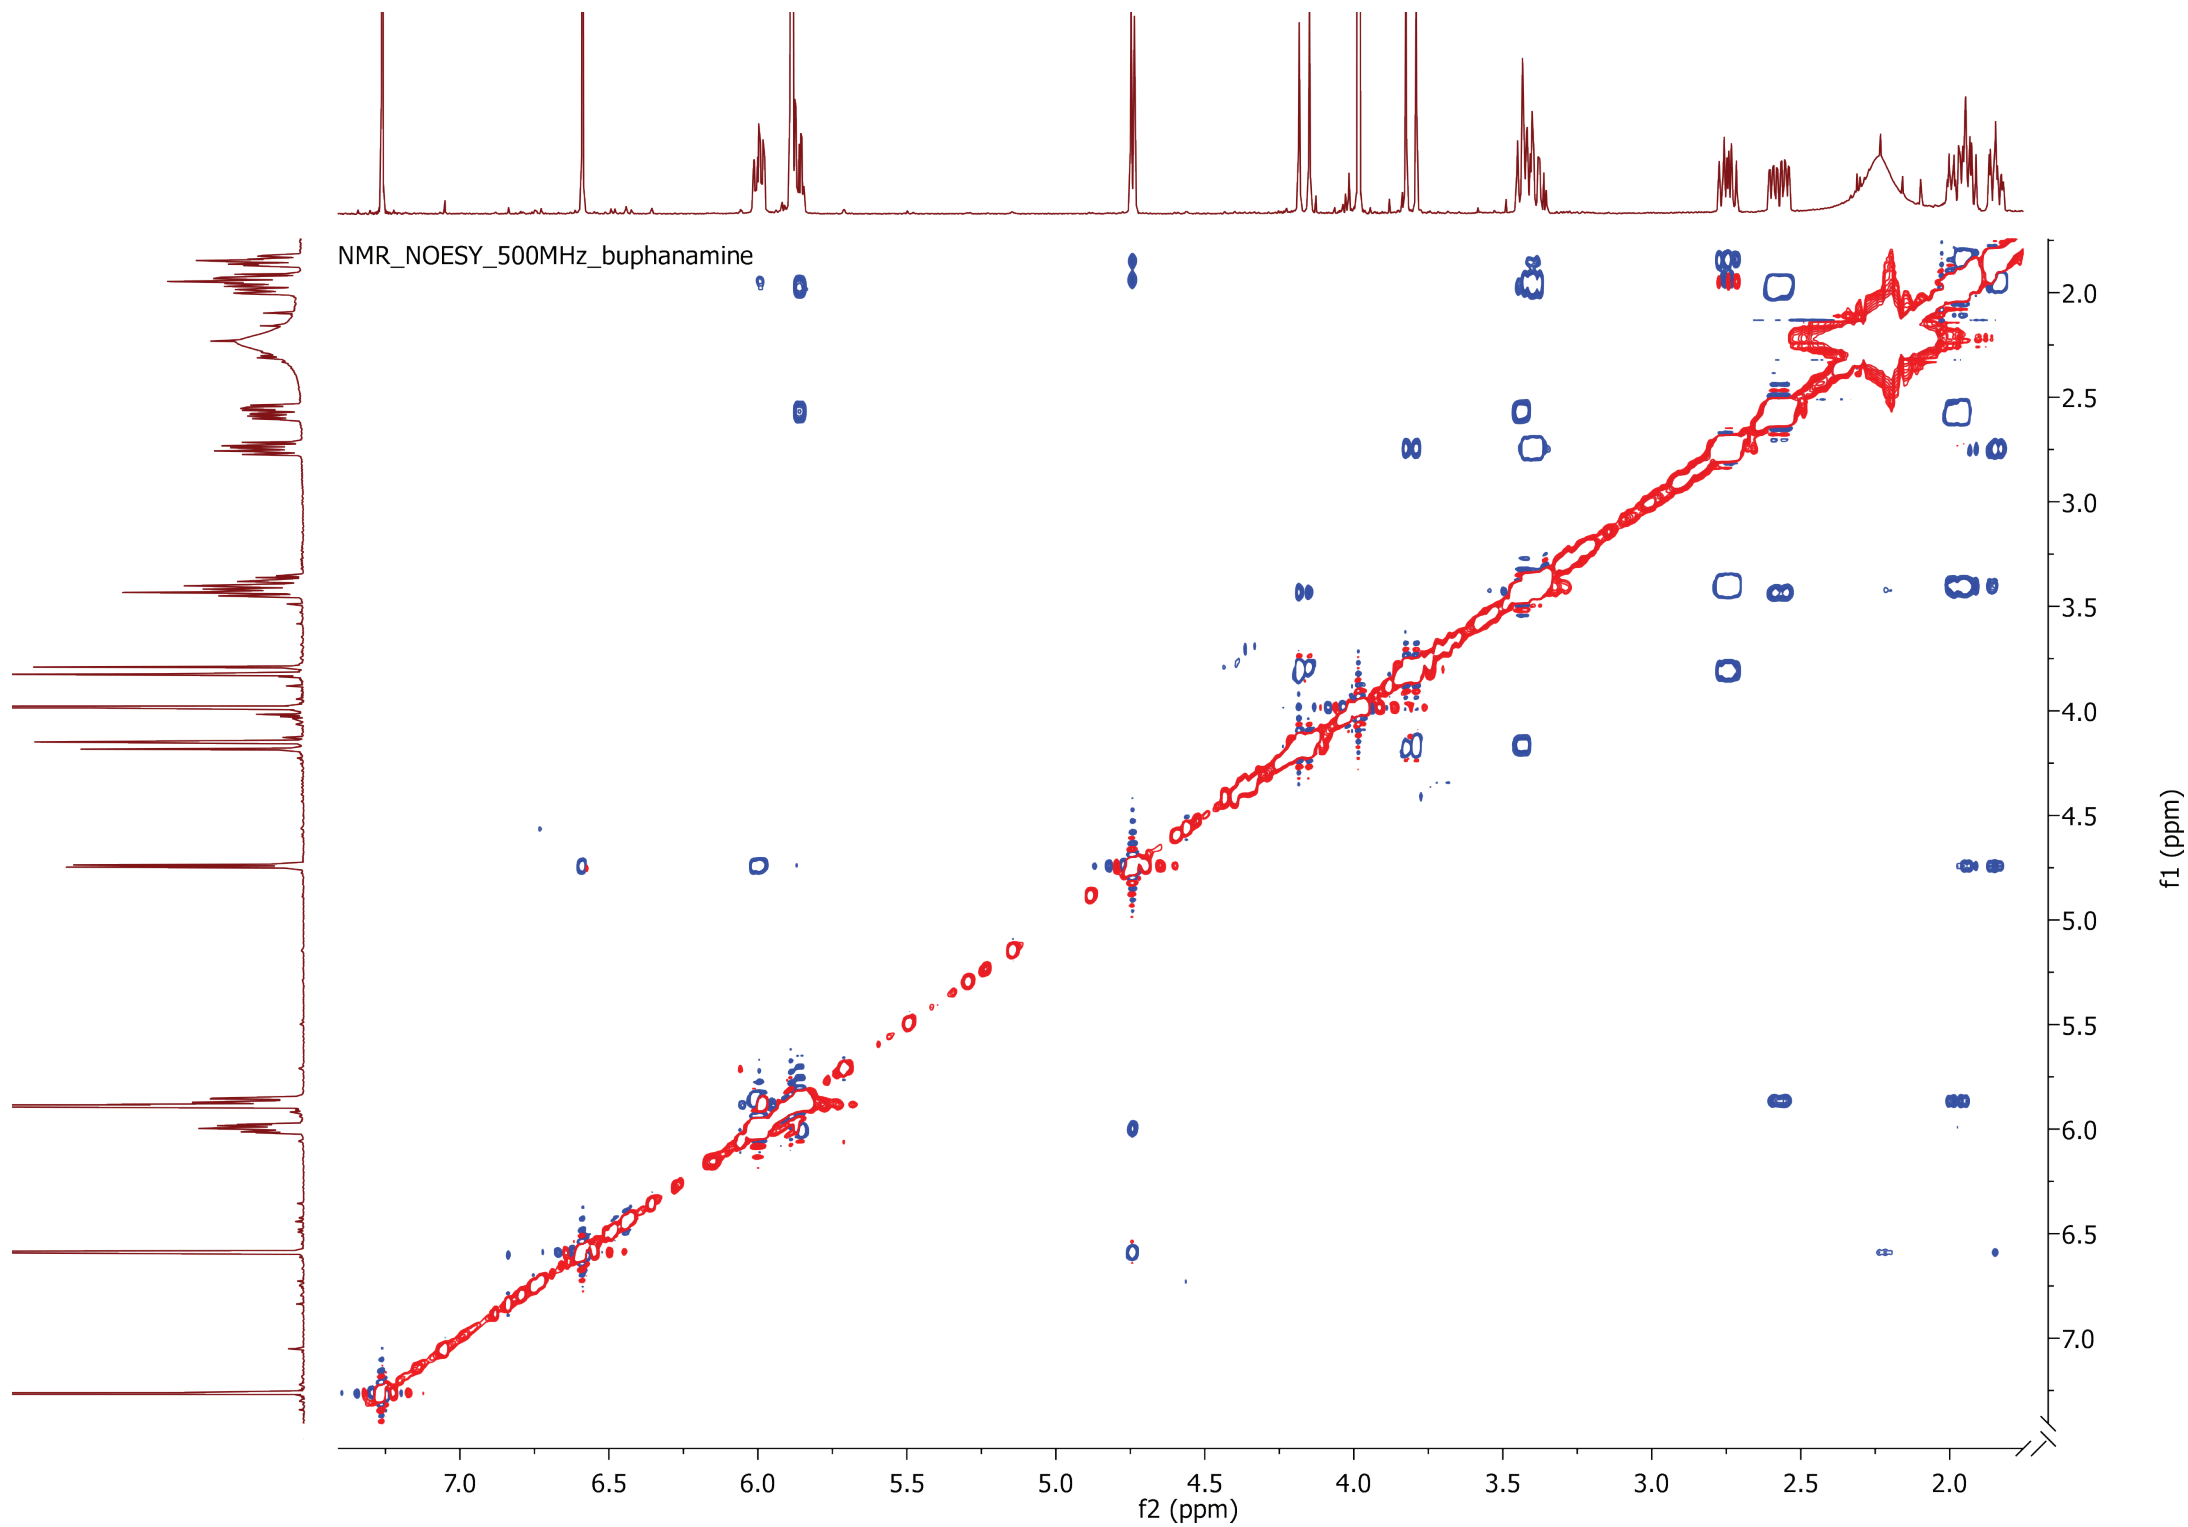

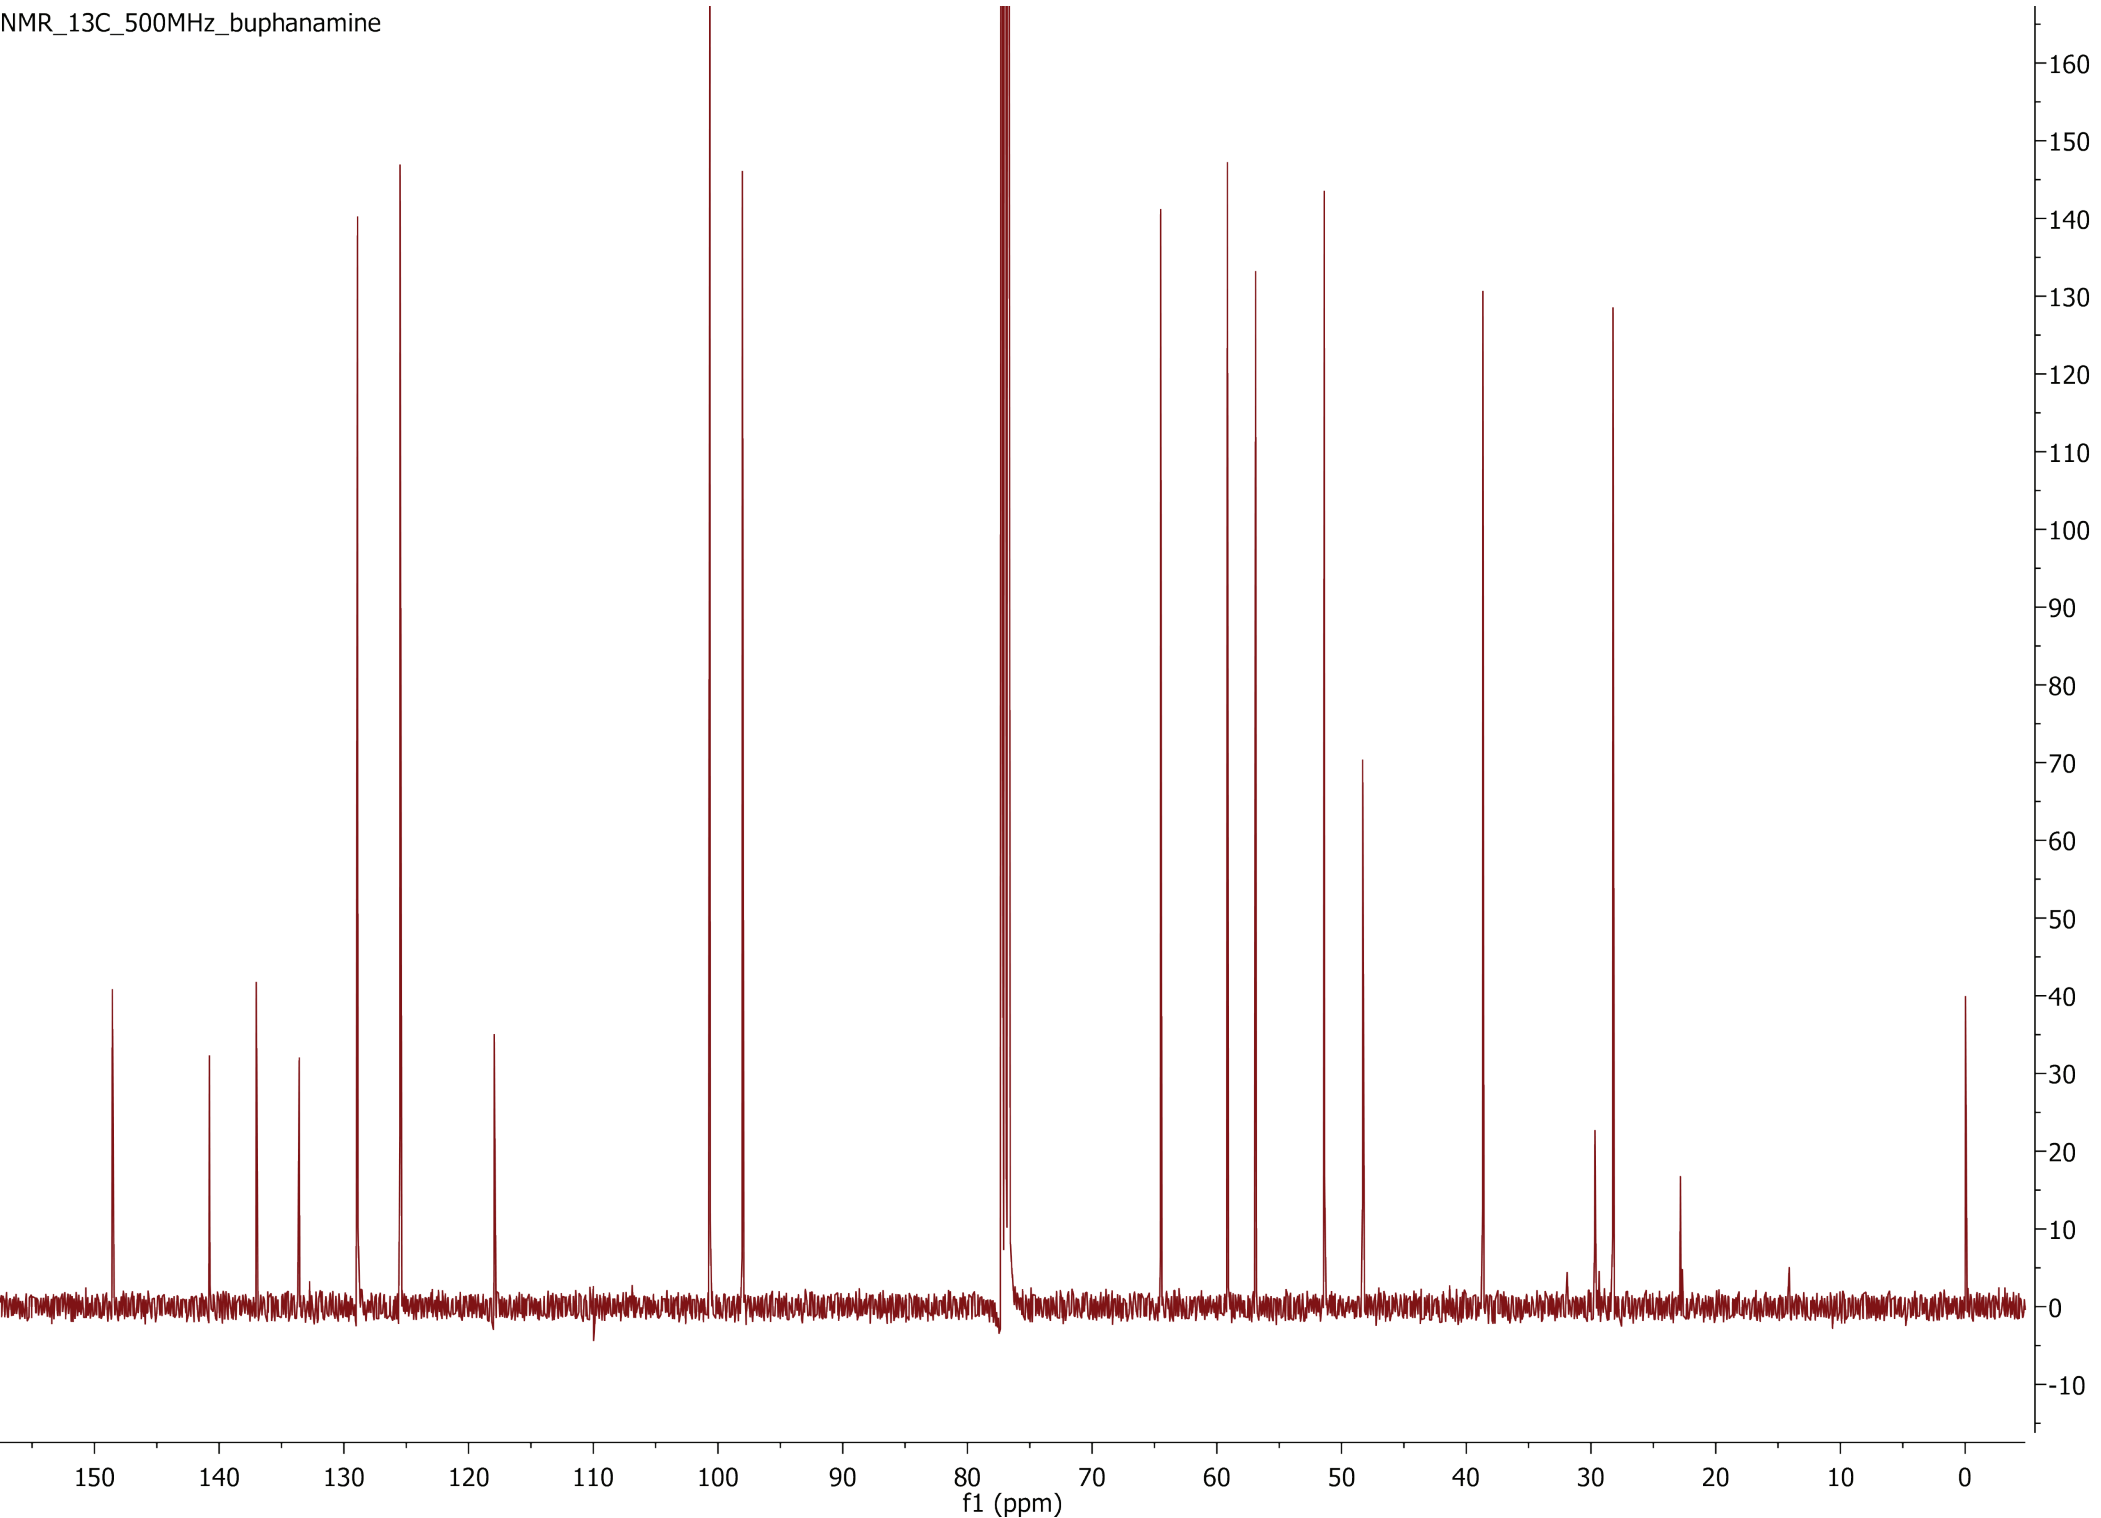

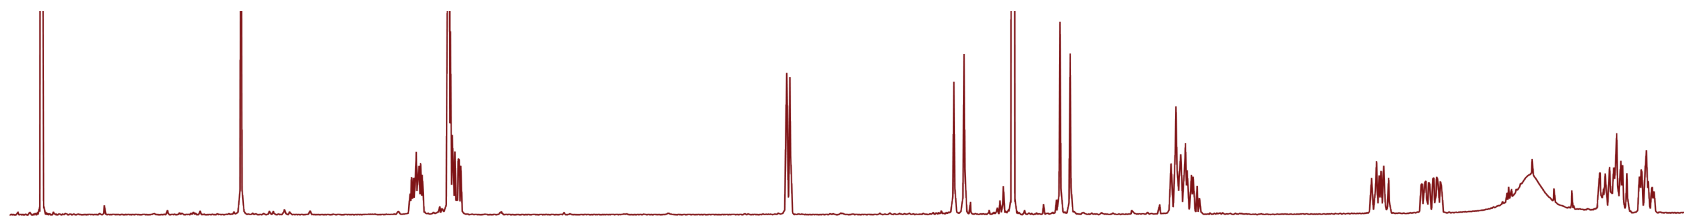

NMR\_HSQC\_500MHz\_buphanamine

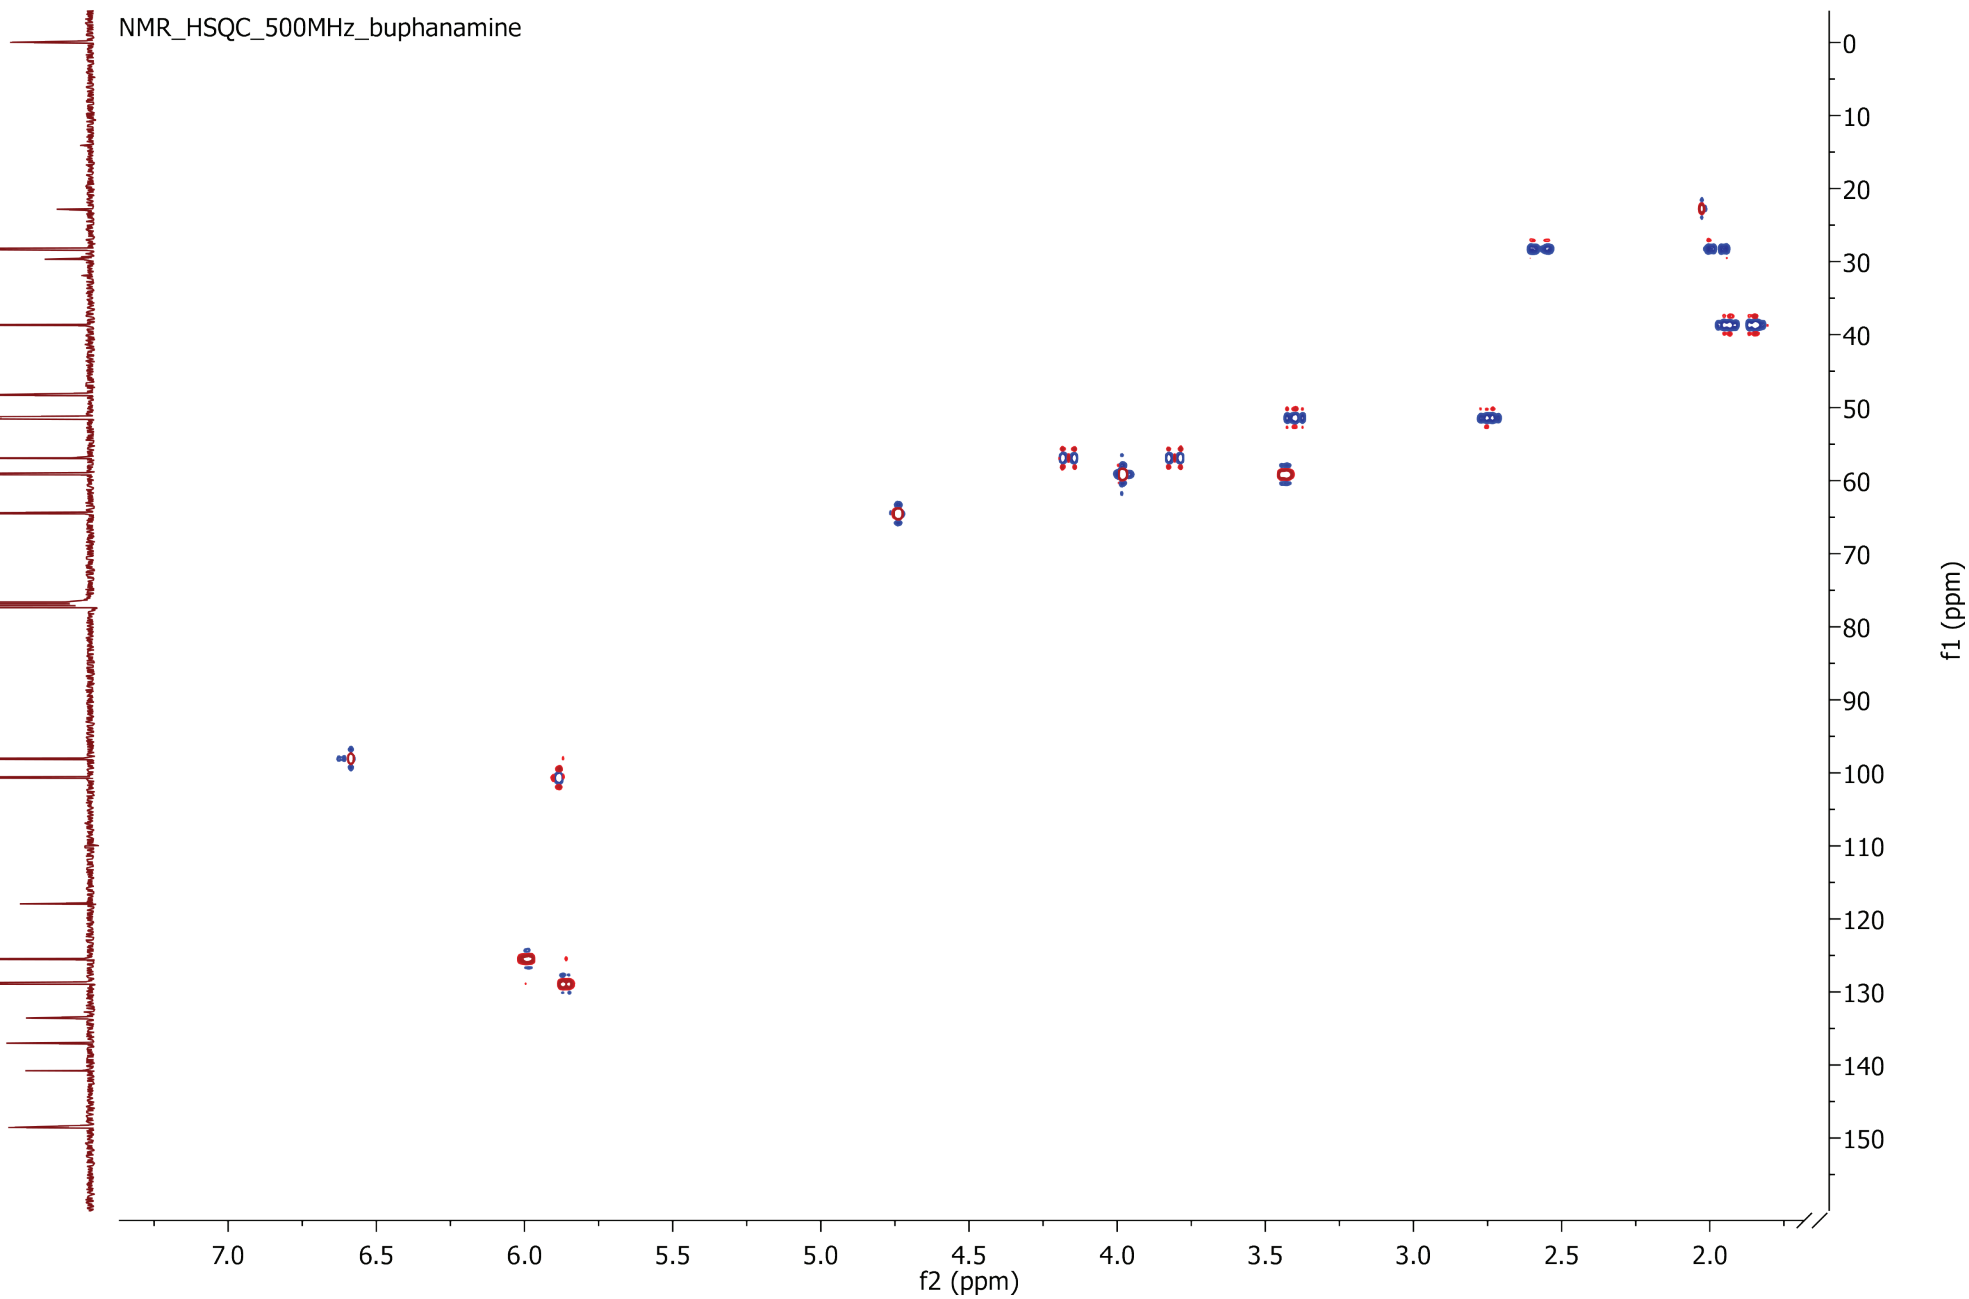

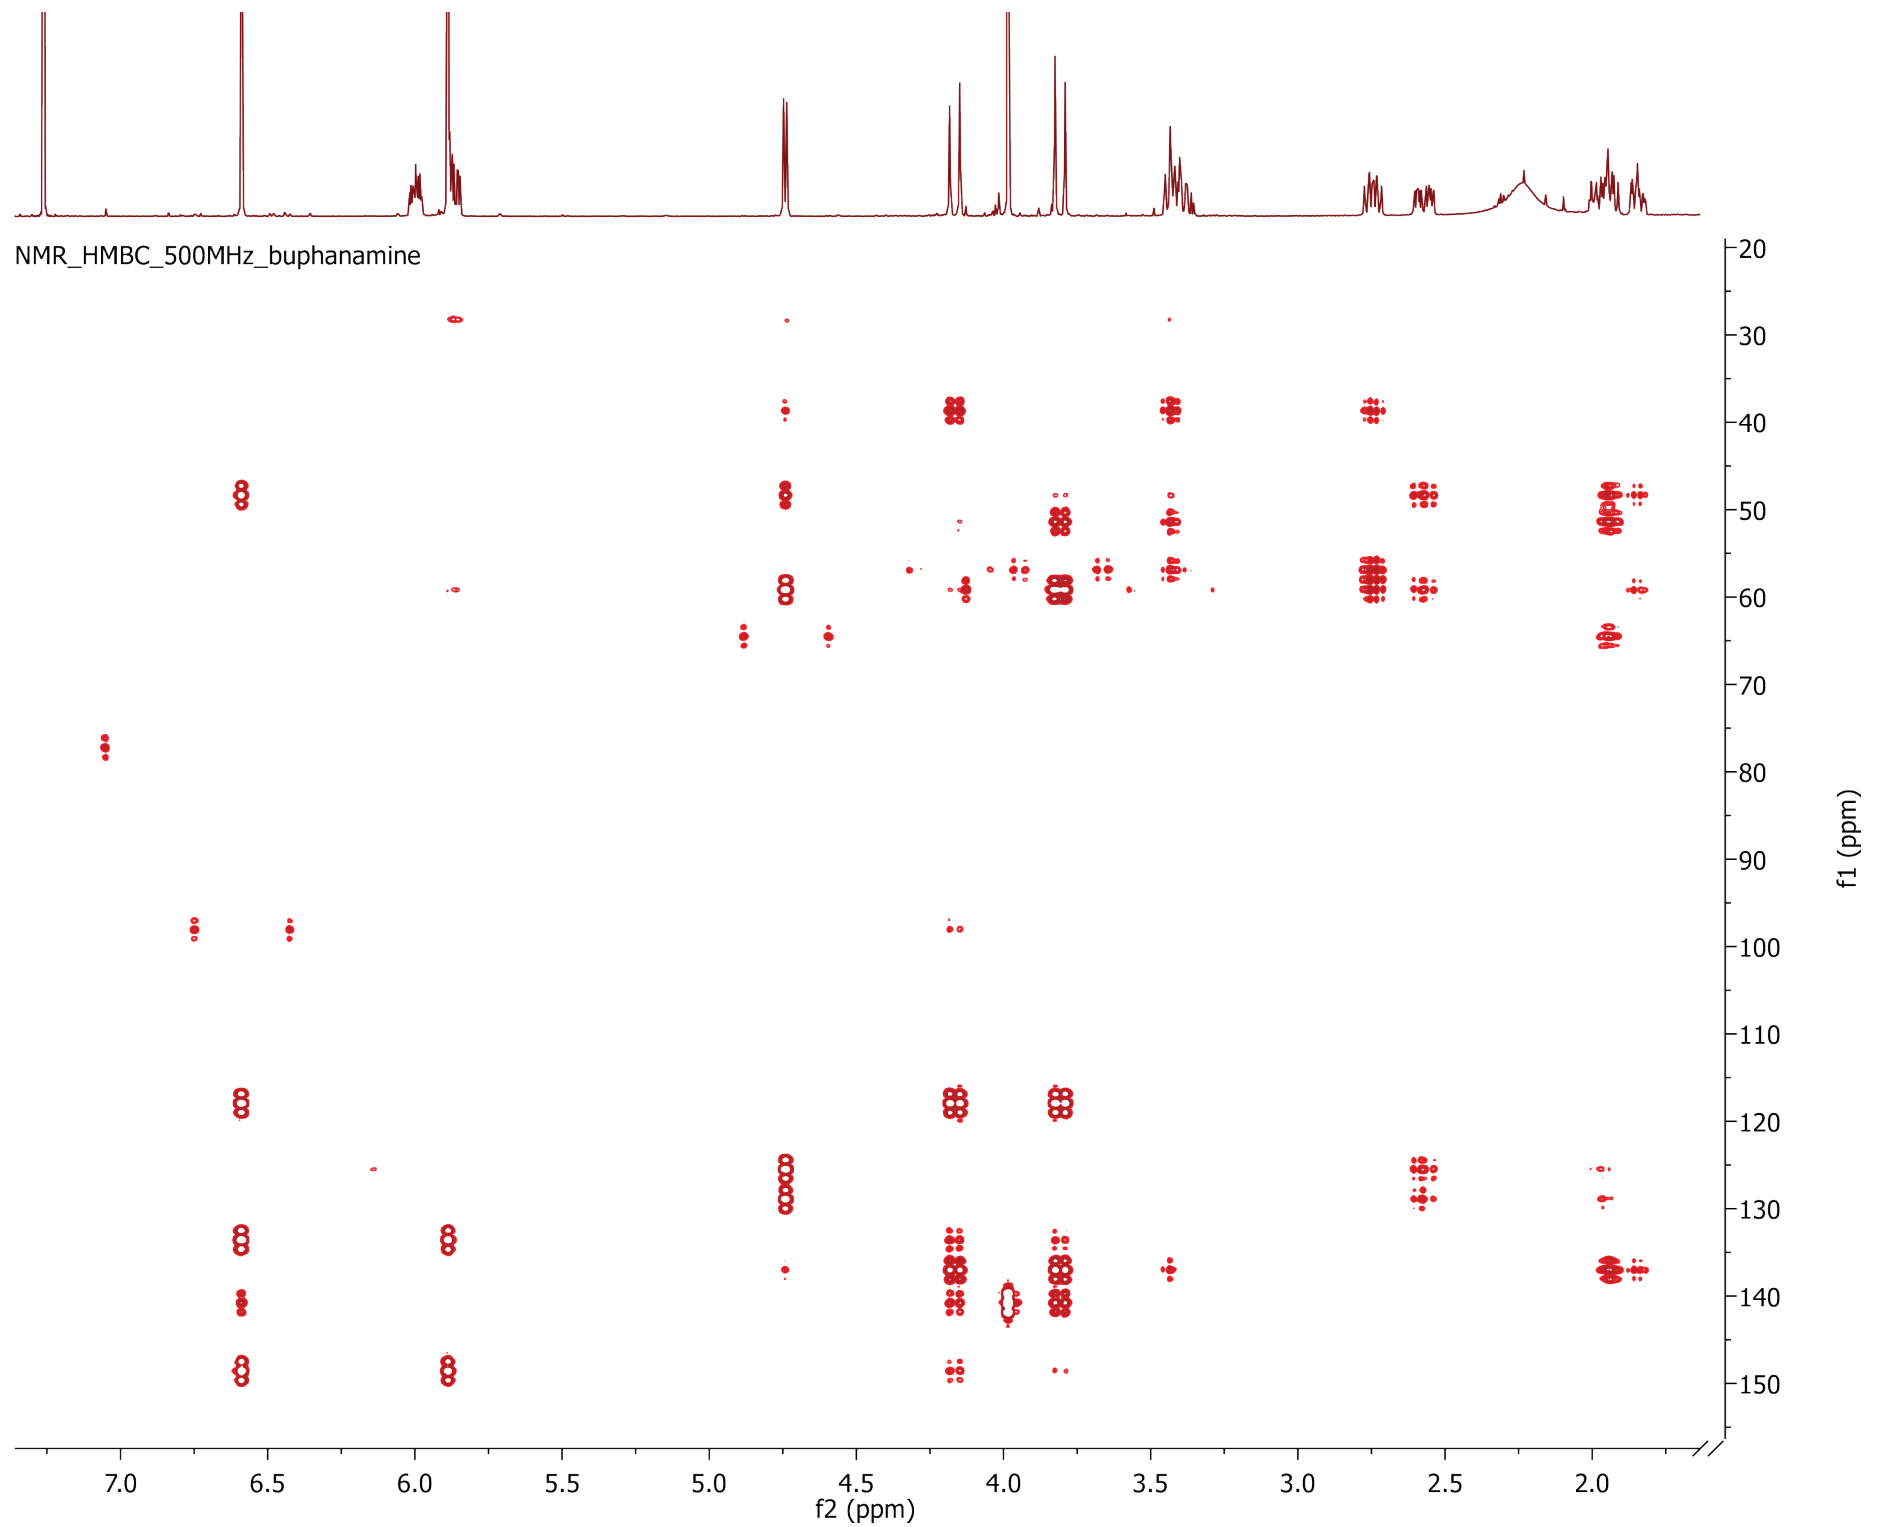

Supplement: s1 [file s1]

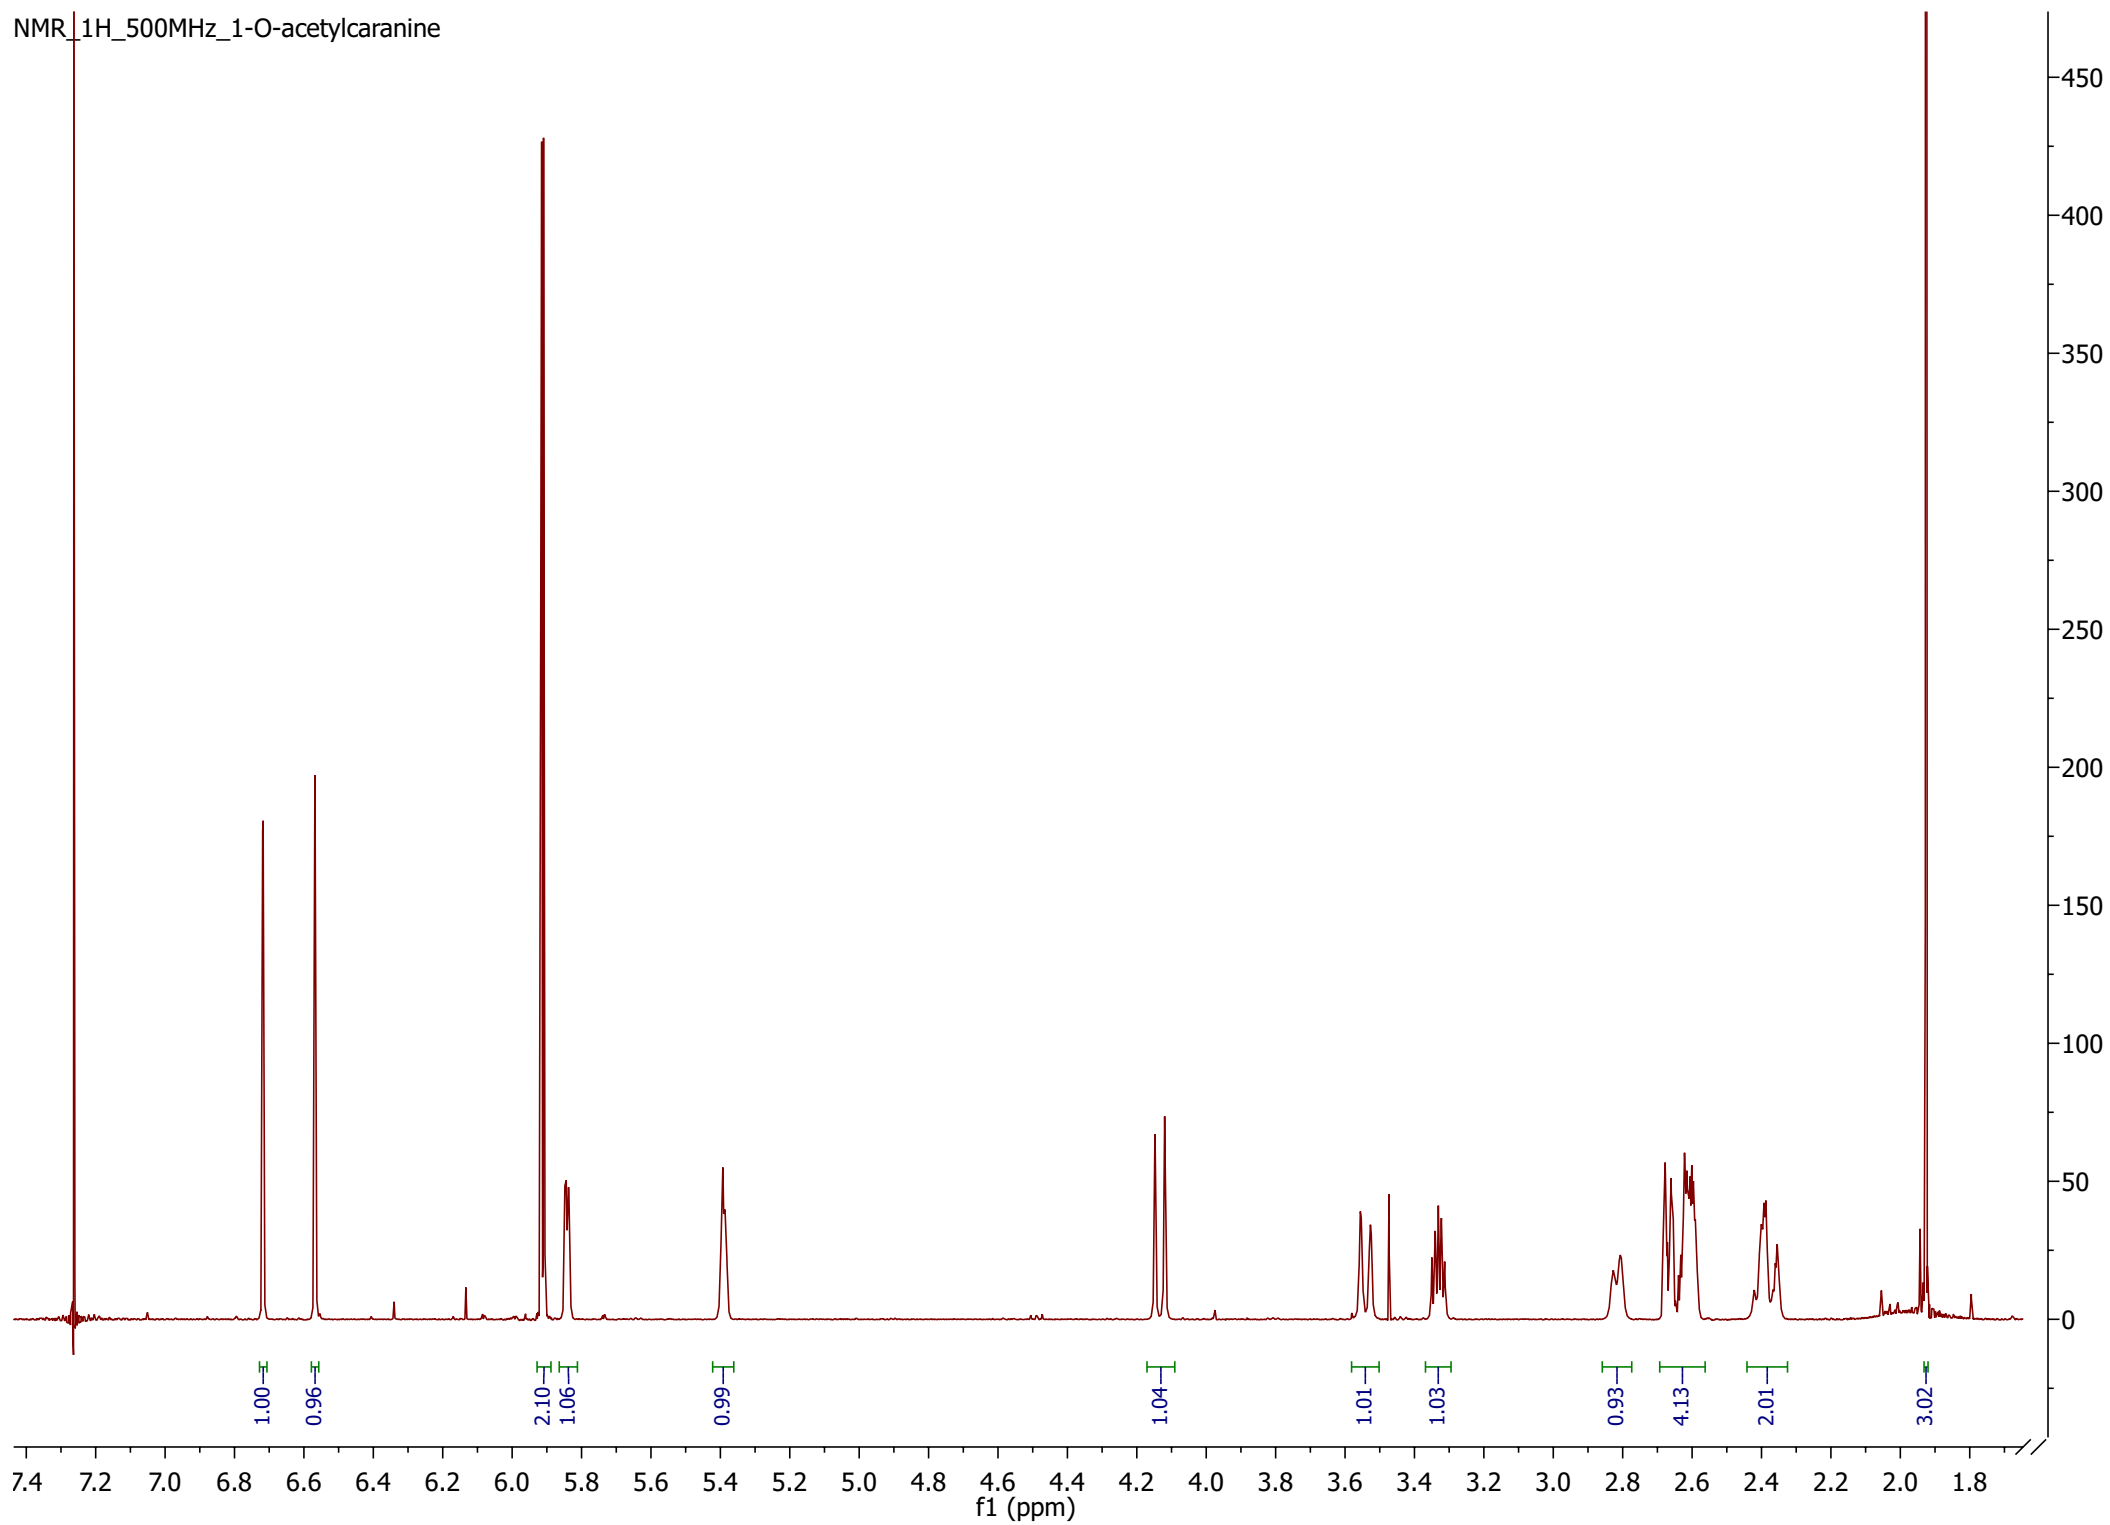

NMR\_COSY\_500MHz\_1-O-acetylcaranine

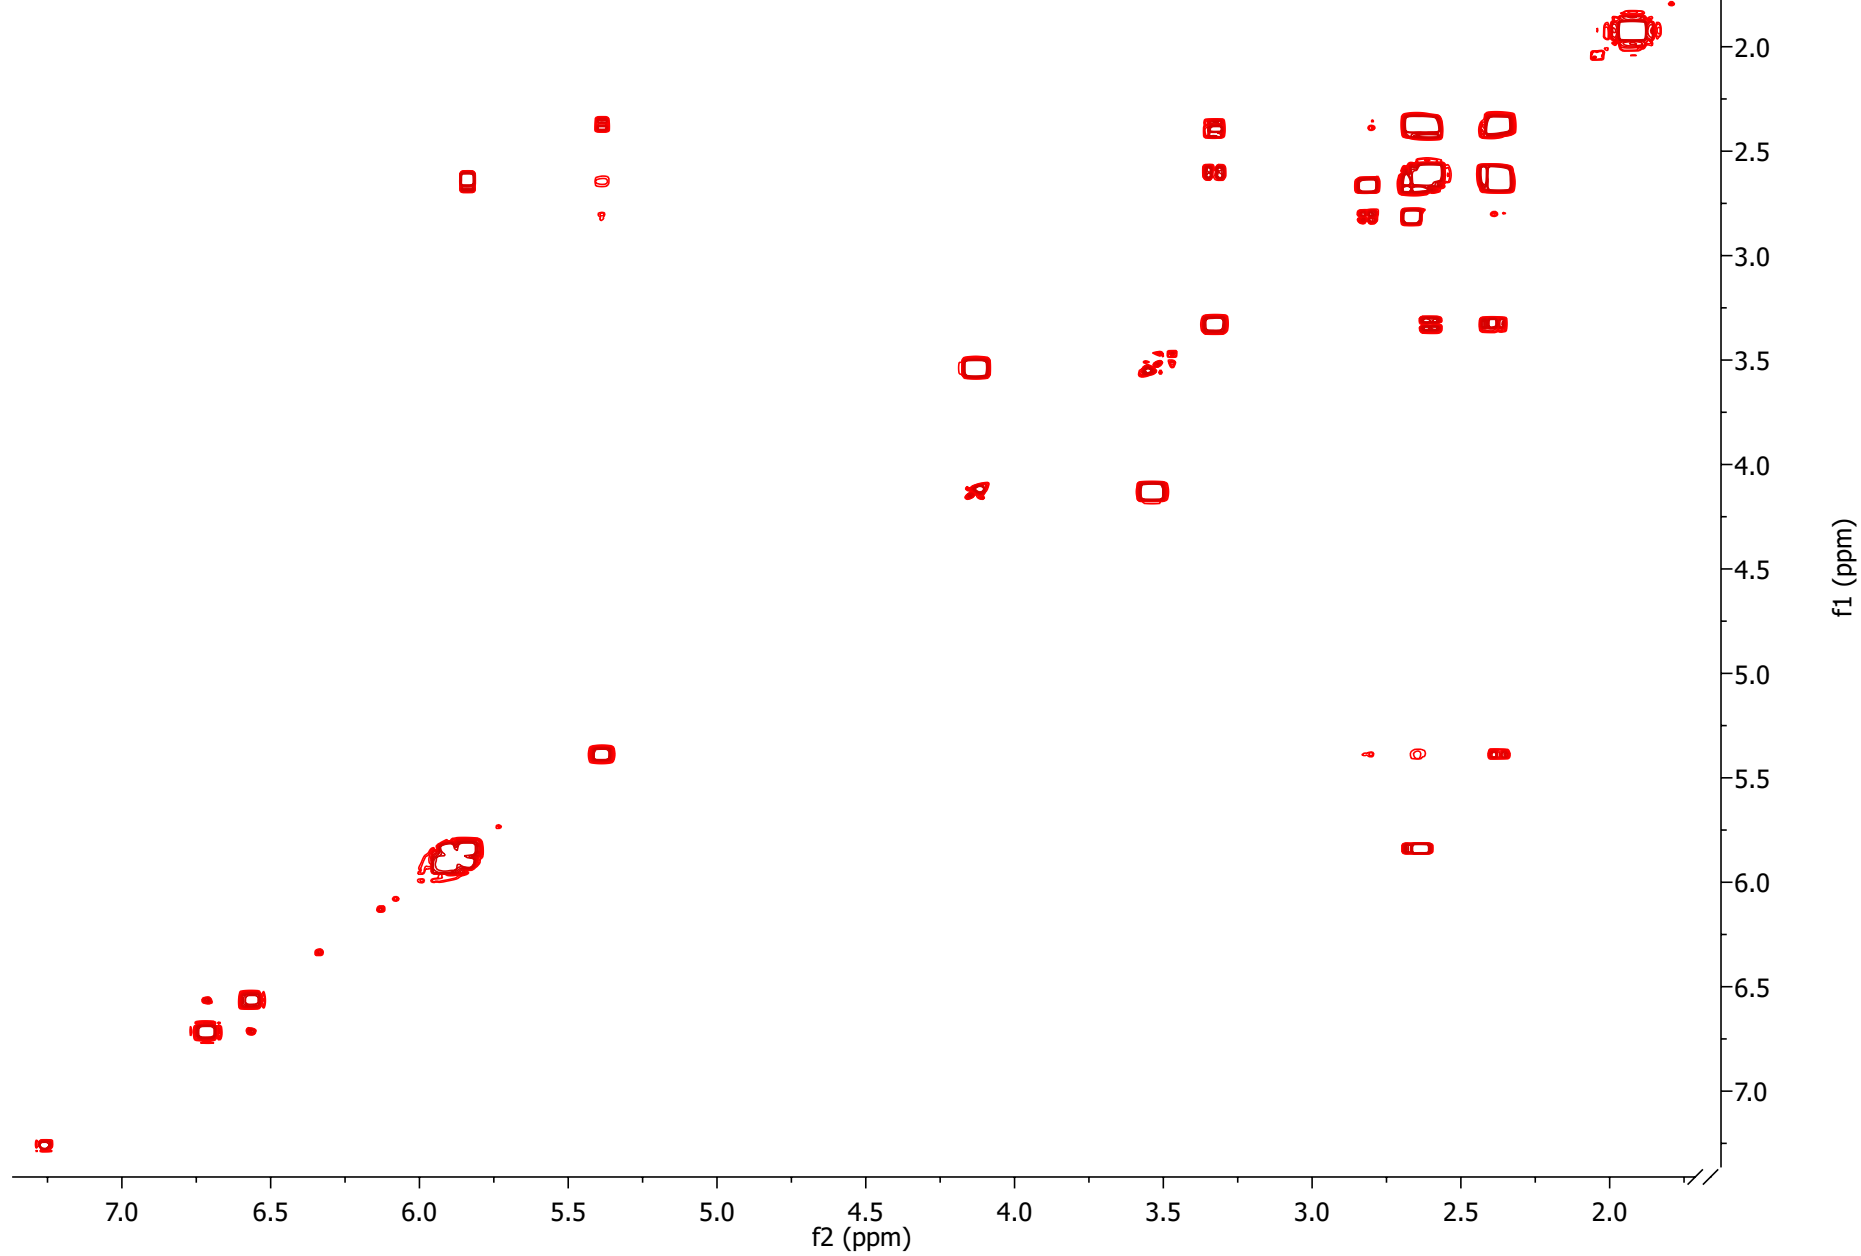



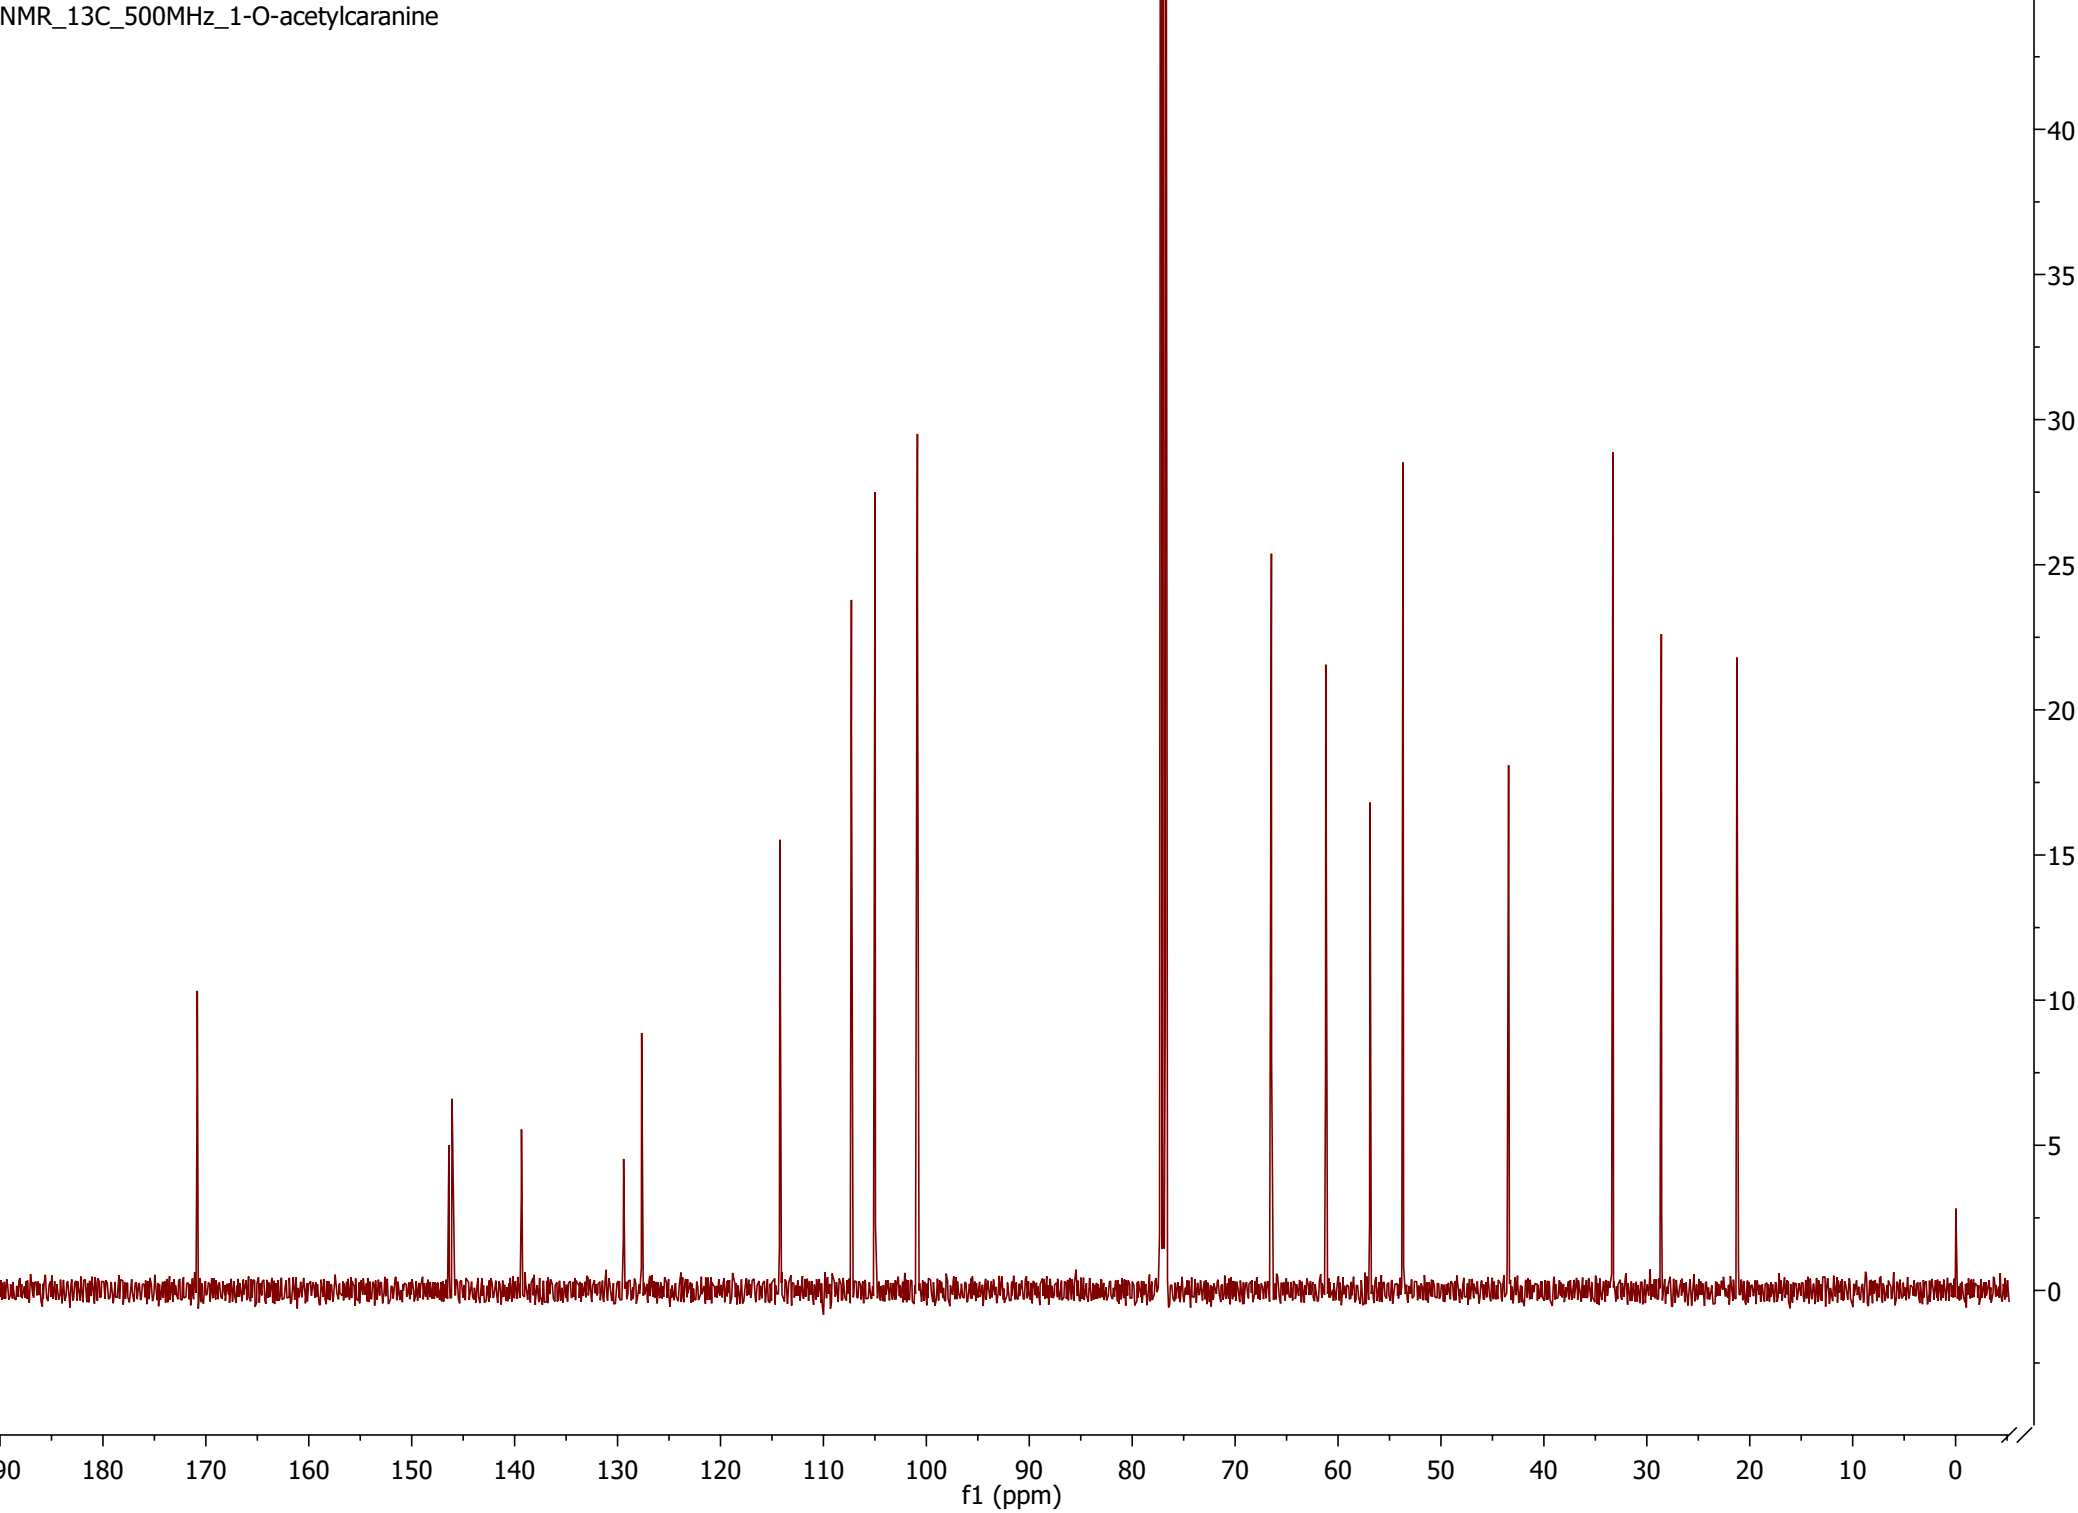

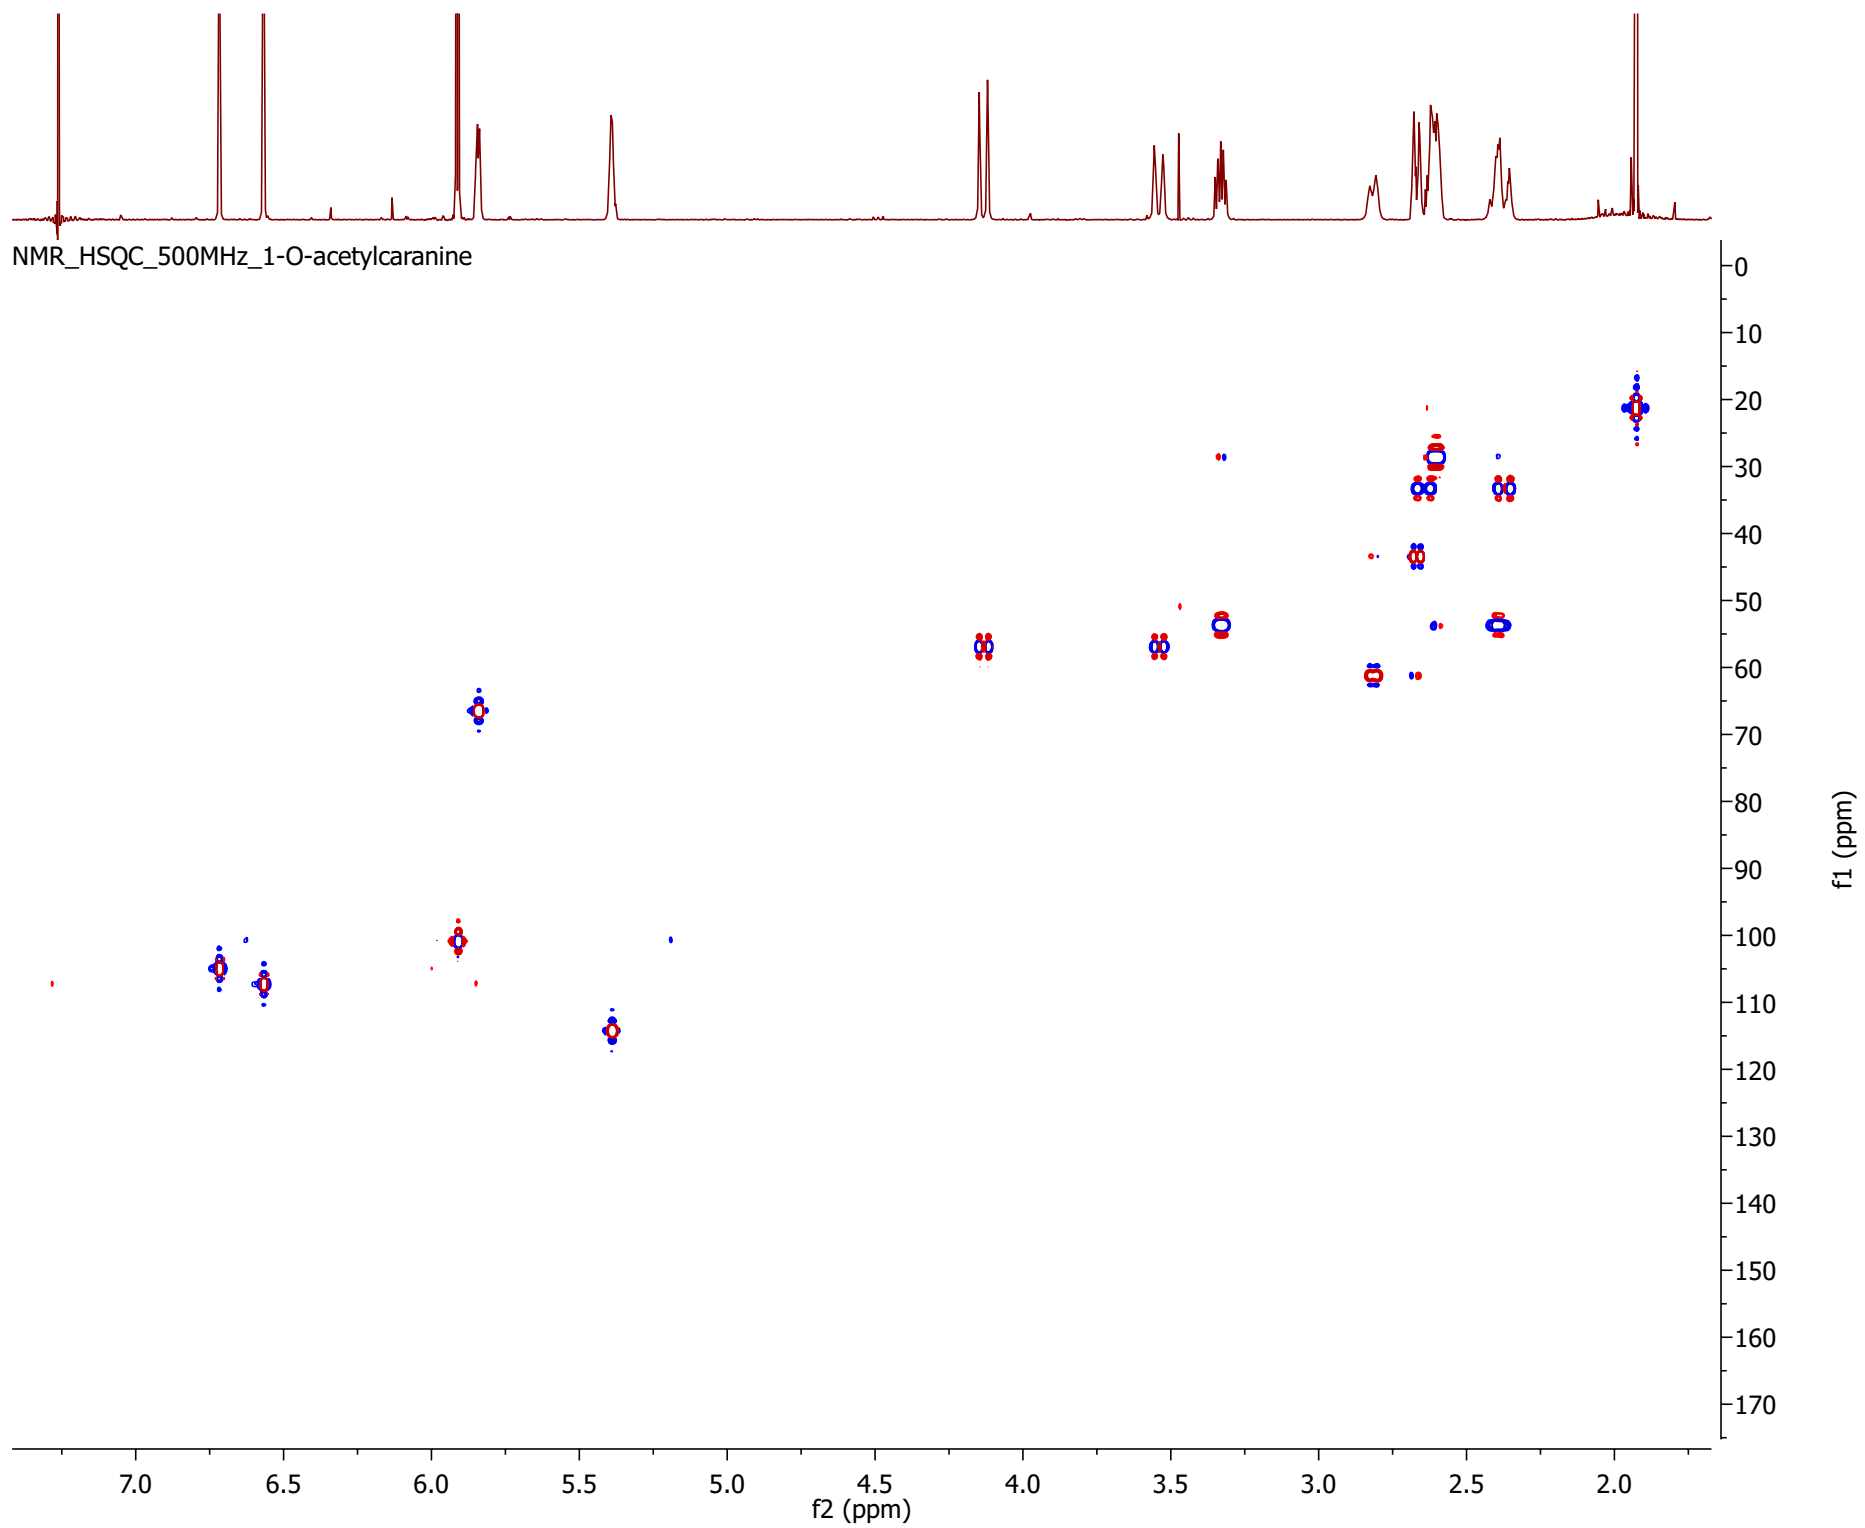

NMR\_HMBC\_500MHz\_1-O-acetylcaranine

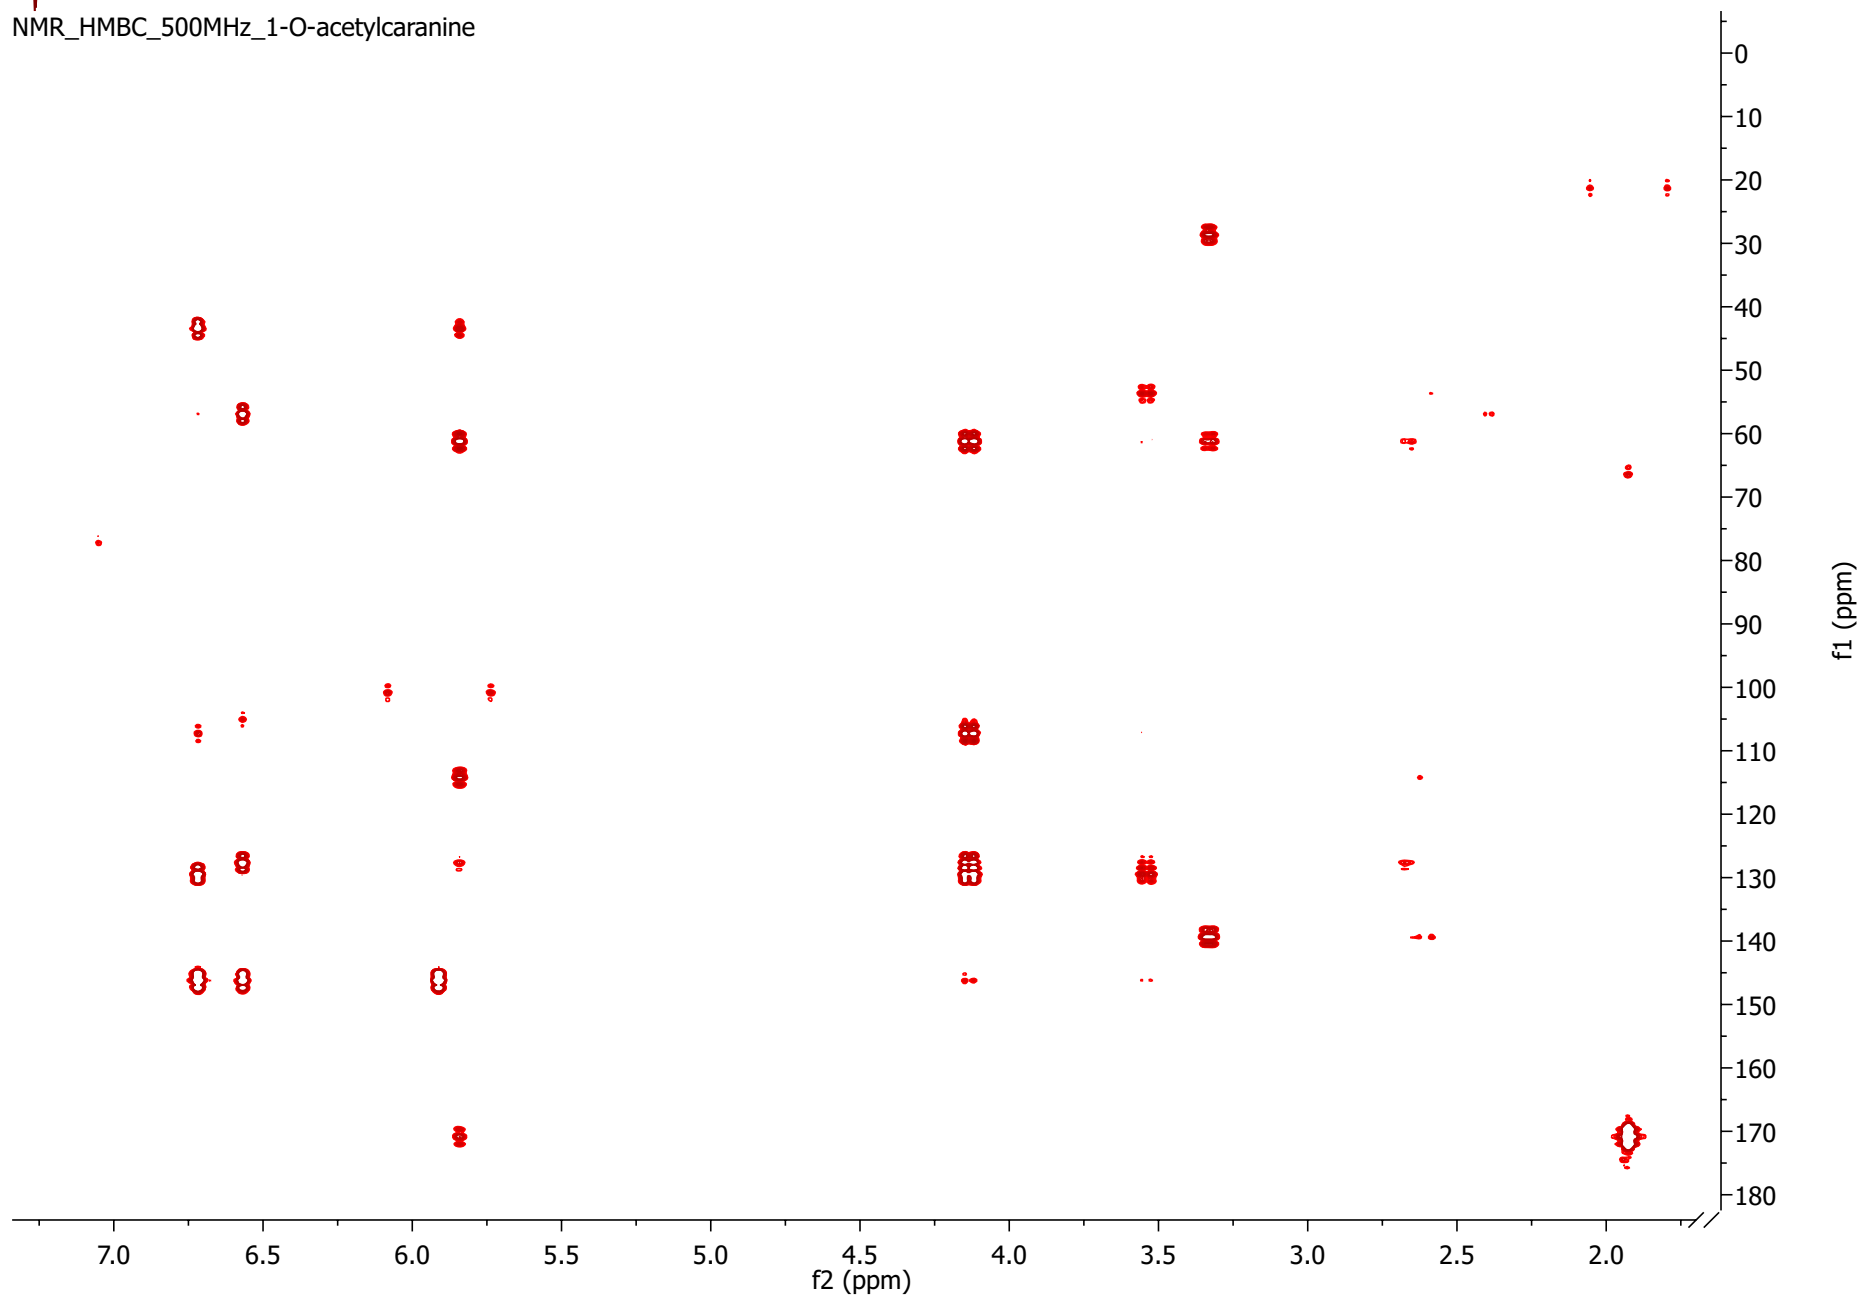

Supplement: s1 [file s1]
